# Supplementary material
Source: publisher figshare collection journal article supplement (https://tandf.figshare.com/ndownloader/files/18155213)
Supplement: Supplementary file 1 [file 18155213]

## APPENDIX

In this appendix, we attached a sample reading on Integration by Parts and the associated reading quiz from Implementation I. Similarly, we attached a sample reading on Cross Product and the associated reading HW from Implementation II. Additionally, we have 4 charts with captions to expand on our quantitative data.

## Calculus-II

### Integration by Parts

---

We have seen so far how to use the substitution rule. It is worth noting that the substitution rule for integrals is the opposite of the chain rule for derivatives:

- Chain Rule:  $\left(f(g(x))\right)' = f'(g(x))g'(x)$ ,
- Substitution Rule:  $\int f'(g(x))g'(x) dx = f(g(x)) + C$  using  $u = g(x)$ .

We will find the opposite of the product rule of derivatives. It is called **integration by parts**.

- Product Rule:  $(uv)' = u'v + uv'$ ,
- Integration by Parts:  $\int u dv = uv - \int v du$ .

To get this formula, we rewrite the product rule as  $\frac{d}{dx}(uv) = \frac{du}{dx} \cdot v + u \cdot \frac{dv}{dx}$ , then we integrate both sides to get

$$uv = \int v du + \int u dv,$$

which can be written as  $\int u dv = uv - \int v du$ .

**Example 1** To integrate  $\int xe^x dx$  we choose  $u = x$  and  $dv = e^x dx$ , thus  $du = dx$  and  $v = e^x$ . Then

$$\int xe^x dx = xe^x - \int e^x dx = xe^x - e^x + C.$$

The other possible choice would be  $u = e^x$  and  $dv = x dx$ , then  $du = e^x dx$  and  $v = \frac{x^2}{2}$  and thus

$$\int xe^x dx = \frac{x^2}{2}e^x - \int \frac{x^2}{2}e^x dx,$$

which is actually more complicated than the one we started with.

**Remark 1** The above example shows that when we choose  $u$  and  $dv$ , we need to keep in mind two things:

1. we have to be able to integrate  $dv$  to find  $v$ ,
2. the second integral we get should be easier than the one we started with.

**Example 2** To integrate  $\int x \ln(x) dx$  we choose  $u = \ln(x)$ , and  $dv = x dx$ , then  $du = \frac{dx}{x}$  and  $v = \frac{x^2}{2}$ .

$$\int x \ln(x) dx = \frac{x^2}{2} \ln(x) - \int \frac{x^2}{2} \cdot \frac{dx}{x} = \frac{x^2}{2} \ln(x) - \frac{x^2}{4} + C.$$

These two examples can be generalized as follows. When we have a power of  $x$  with  $e^x$ ,  $dv$  is chosen to be  $e^x dx$ . When we have a power of  $x$  with  $\ln x$ , then  $dv$  is chosen to be the power of  $x$ .

---

#### Reading Quiz:

To find  $\int x^2 \ln x dx$  we need to use the formula  $\int u dv = uv - \int v du$ .

use  $u = \ln x$  then  $du = \dots\dots\dots dx$

use  $dv = x^2 dx$  then integrate to get  $v = \dots\dots\dots$

Thus  $\int x^2 \ln x dx = (\dots\dots\dots)(\dots\dots\dots) - \int \dots\dots\dots dx =$

## Calculus-III

### Cross Product

---

In this section, we introduce a new operation on vectors. We saw previously how the dot product of two vectors gave a scalar. However, the new operation, called cross product, will produce a vector.

**Definition 1** The cross product of two vectors  $\vec{u}$  and  $\vec{v}$  is denoted by  $\vec{u} \times \vec{v}$ . By definition, it is the vector of magnitude  $|\vec{u} \times \vec{v}| = |\vec{u}||\vec{v}|\sin\theta$  where  $\theta$  is the angle between the two vectors. The direction

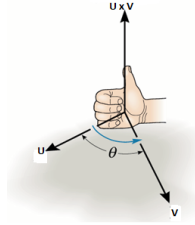

of this new vector is given by the right hand rule

**Example 1** Consider the three coordinate vectors  $\vec{i}, \vec{j}, \vec{k}$ . the angle between any two of these is 90 degrees making  $\sin\theta = 1$ . Their magnitude is also one. By the right-hand rule we have:  $\vec{i} \times \vec{j} = \vec{k}$ ,  $\vec{j} \times \vec{k} = \vec{i}$ , and  $\vec{k} \times \vec{i} = \vec{j}$ .

**Definition 2** The cross product has the following properties:

- $\vec{u}$  and  $\vec{v}$  are parallel ( $\theta = 0, \pi$ ) if and only if  $\vec{u} \times \vec{v} = \vec{0}$ .
- If we complete the parallelogram made by  $\vec{u}$  and  $\vec{v}$ , we can compute its area by  $|\vec{u} \times \vec{v}|$ .
- $\vec{u} \times \vec{v} = -\vec{v} \times \vec{u}$ .
- $\vec{u} \times (\vec{v} + \vec{w}) = \vec{u} \times \vec{v} + \vec{u} \times \vec{w}$ .
- $(a\vec{u}) \times \vec{v} = \vec{u} \times (a\vec{v}) = a(\vec{u} \times \vec{v})$ .

**Example 2** From the first property, we find that  $\vec{u} \times \vec{u} = \vec{0}$ .

From the third property and example 1, we find that  $\vec{j} \times \vec{i} = -\vec{k}$  and  $\vec{i} \times \vec{k} = -\vec{j}$ .

From the fourth property, we can find  $\vec{i} \times (\vec{j} + \vec{k}) = \vec{i} \times \vec{j} + \vec{i} \times \vec{k} = \vec{k} - \vec{j}$ .

This last example gives the intuition on finding a formula for  $\vec{u} \times \vec{v}$  algebraically. Recall that we can write any vector  $\vec{u}$  as  $\vec{u} = u_1\vec{i} + u_2\vec{j} + u_3\vec{k}$ . Given another vector  $\vec{v} = v_1\vec{i} + v_2\vec{j} + v_3\vec{k}$ , we can use the above properties to compute  $\vec{u} \times \vec{v}$ :

**Definition 3** By foiling out  $\vec{u} \times \vec{v} = (u_1\vec{i} + u_2\vec{j} + u_3\vec{k}) \times (v_1\vec{i} + v_2\vec{j} + v_3\vec{k})$ , we get:

$$\vec{u} \times \vec{v} = (u_2v_3 - u_3v_2)\vec{i} - (u_1v_3 - u_3v_1)\vec{j} + (u_1v_2 - u_2v_1)\vec{k}.$$

We will see in class how we can write this formula as a determinant of a matrix, a new idea that you will see in future math classes.

#### Reading HW:

1. What is the angle between the vector  $\vec{u} \times \vec{v}$  and the vectors  $\vec{u}, \vec{v}$ ?
2. a. Draw the parallelogram made by the vectors  $2\vec{i}$  and  $3\vec{j}$ . Compute its area using geometrical formulas.  
b. Compare this area to  $|2\vec{i} \times 3\vec{j}|$ .
3. Apply the formula in Definition 3 to compute  $\langle 1, 1, 1 \rangle \times \langle -1, 0, 2 \rangle$ .

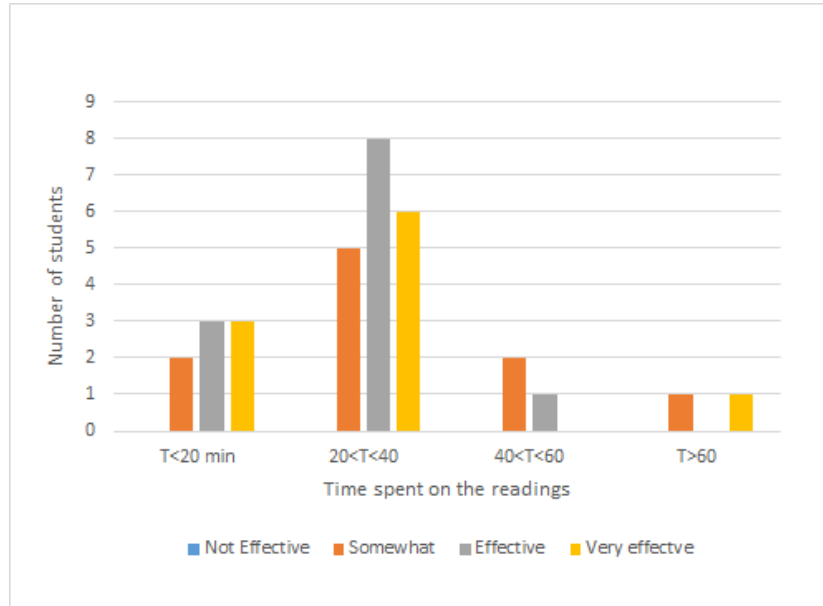

**Figure 1.** Time spent on readings vs. effectiveness of the readings (Implementation I)

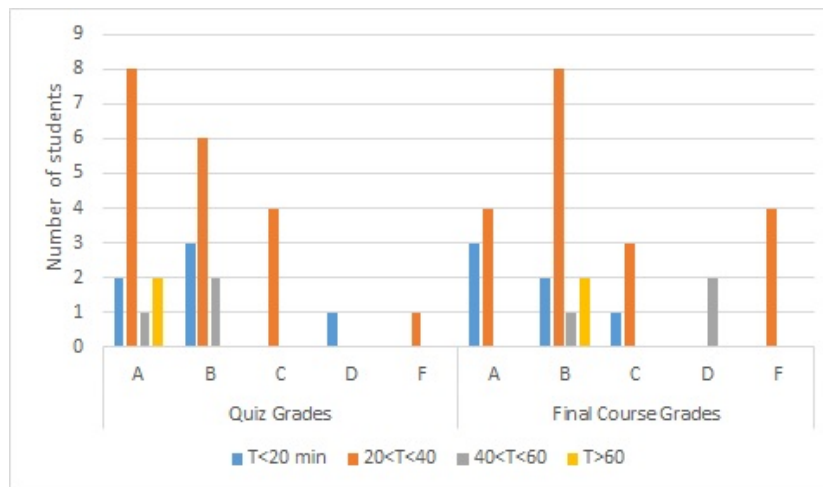

**Figure 2.** Time spent on readings vs. quiz and final course grades (Implementation I)

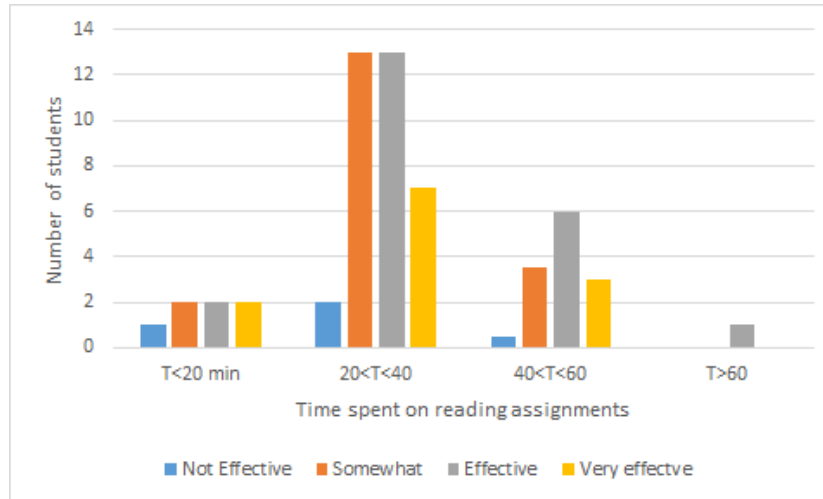

**Figure 3.** Time spent on readings vs. effectiveness of the readings (Implementation II)

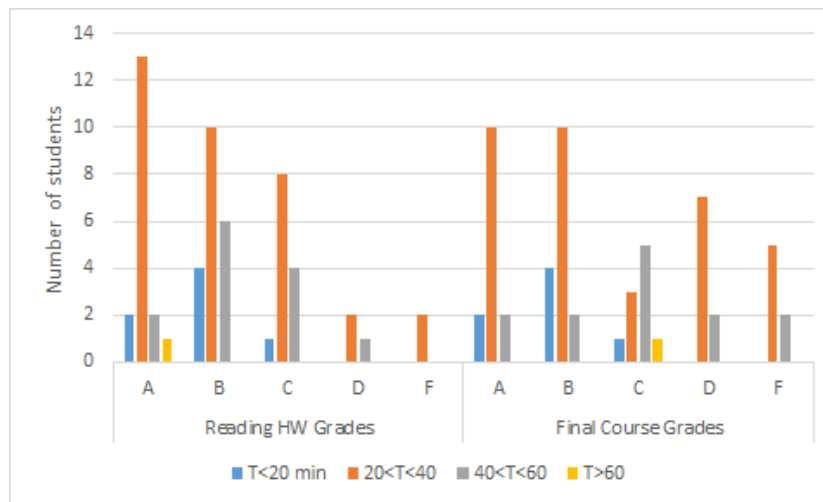

**Figure 4.** Time spent on readings vs. reading homework and final course grades (Implementation II)
